# Supplementary material for: In situ growth of FeS microsheet networks with enhanced electrochemical performance for lithium-ion batteries
Source: Royal Society of Chemistry journal article supplement (doi:10.1039/c4ta07031c), 2015-01-01
Supplement: c4ta07031c1.pdf [file c4ta07031c1.pdf]

# ***In-situ* Growth of FeS Microsheet Networks with Enhanced Electrochemical Performance for Lithium-Ion Batteries**

**Chengcheng Xing,<sup>a</sup> Dan Zhang,<sup>a</sup> Ke Cao,<sup>a</sup> Shumin Zhao,<sup>b</sup> Jiabin Liu,<sup>\*a</sup> Yinzhu Jiang<sup>\*a</sup> and Liang Meng<sup>a</sup>**

<sup>a</sup> College of Materials Science and Engineering, Zhejiang University, Hangzhou 310027, China. Fax: +86 57187953134; Tel: +86 57187953134; E-mail: [liujiabin@zju.edu.cn](mailto:liujiabin@zju.edu.cn); [yzjiang@zju.edu.cn](mailto:yzjiang@zju.edu.cn).

<sup>b</sup> College of Materials and Environmental Engineering, Hangzhou Dianzi University, Hangzhou 310018, China

## **1 The quality measuring of FeS**

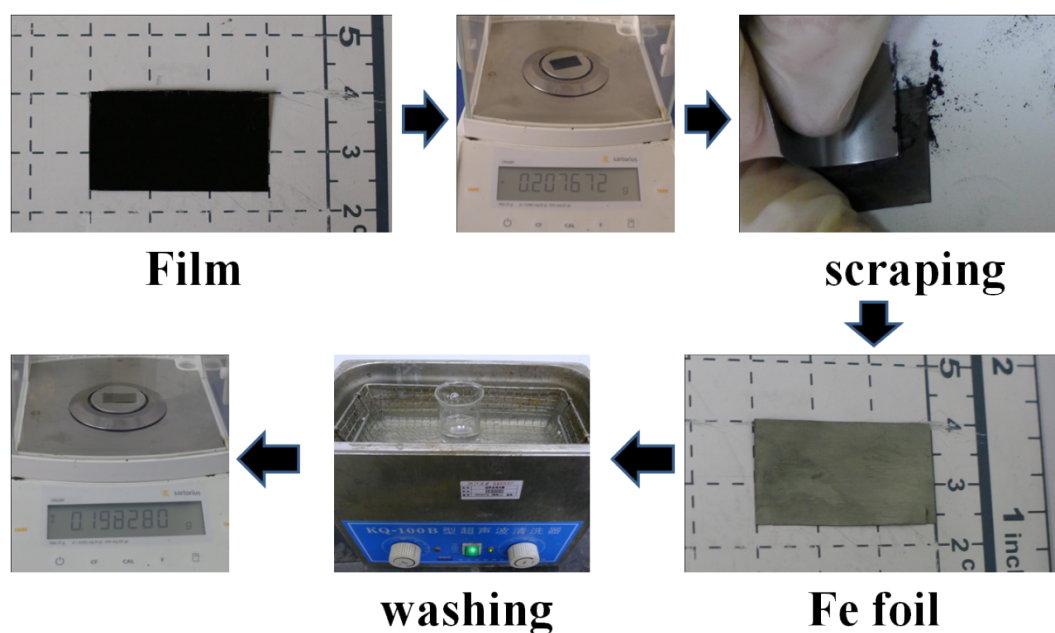

**Fig. S1.** The experimental procedure of FeS quality measuring.

In our synthesis approach, Fe foil is not only as the substrate, but also as an iron source in the reaction. It is hardly to accurately determine the amount of FeS by calculating the quality difference of sample before and after reaction. So we scratched FeS off from Fe substrate, and ultrasonic cleaned Fe substrate. Then we weighed the quality of Fe substrate. Finally, the quality of FeS is the quality difference before and after scratching the film.

## **2 Possible growth mechanism of the FeS films**

---

\* Corresponding author. Tel.: +86 57187951027; fax: +86 57187952358.

E-mail address: [liujiabin@zju.edu.cn](mailto:liujiabin@zju.edu.cn), [yzjiang@zju.edu.cn](mailto:yzjiang@zju.edu.cn)

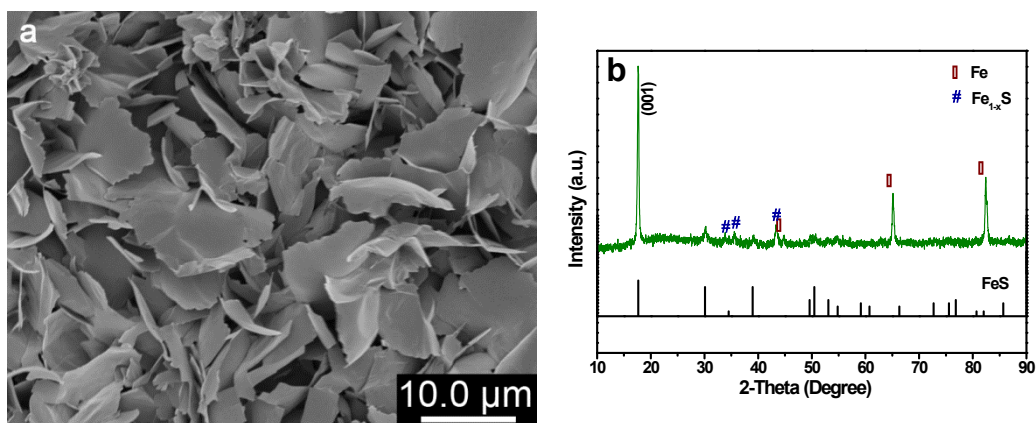

Fig. S2. (a) FESEM image and (b) the corresponding XRD pattern of the product with Tu as sulfur sources in the presence of EDA.
